# Supplementary material
Source: Springer Nature journal article supplement (https://www.springermedizin.de/resource/supplementary/12943_2007_278_MOESM2_ESM.pdf/9553840)

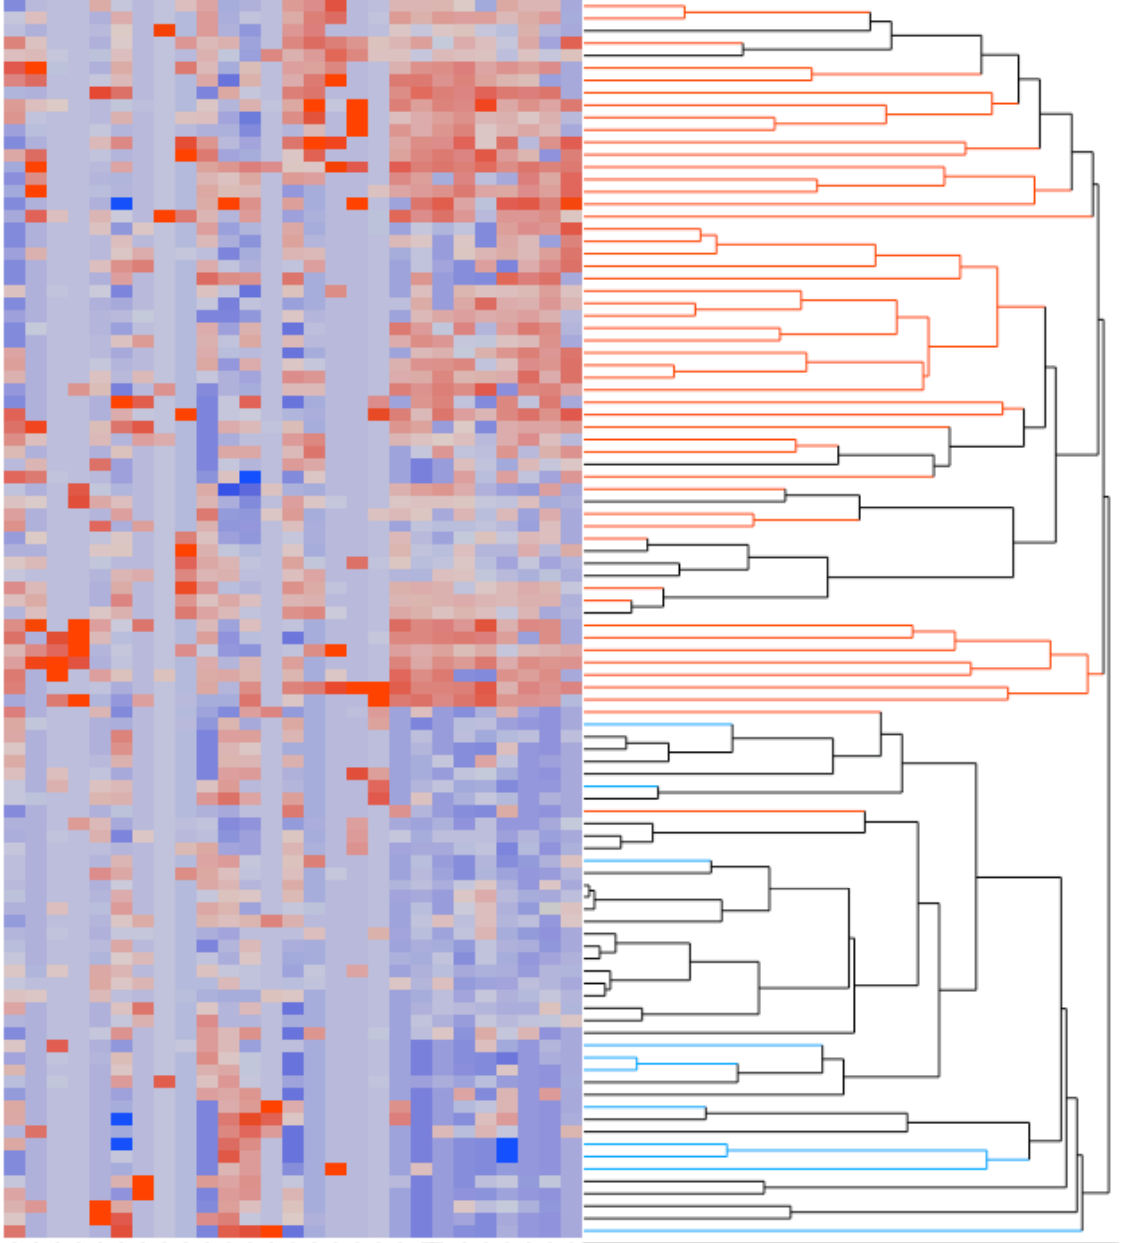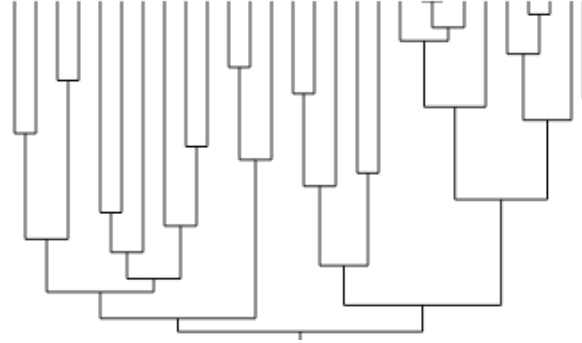

**APC**  
**ESR1**  
**HMGA1**  
**PGR**  
**ATM**  
**CDKN2B**  
**PTEN**  
**CHFR**  
**CYP1B1**  
**MT2A**  
**LZTS1**  
**MT1A**  
**SOC34**  
**CDH1**  
**SFRP4**  
**SLC6A20**  
**MGMT**  
**SYK**  
**CDH13**  
**OPCML**  
**TWIST1**  
**SFRP1**  
**SFRP5**  
**CDKN2A EX2**  
**CDX2**  
**HOXA1**  
**RASSF1**

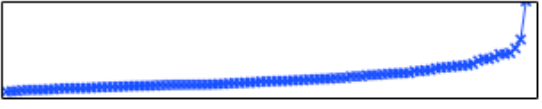

Supplement: MOESM2 [file 9553840]
